# Supplementary material for: SILVOLIVE, a Germplasm Collection of Wild Subspecies With High Genetic Variability as a Source of Rootstocks and Resistance Genes for Olive Breeding
Source: Front Plant Sci. 2020 May 28;11:629. doi: 10.3389/fpls.2020.00629 (PMC7270354; doi:10.3389/fpls.2020.00629)
Supplement: Supplementary file 2 [file Table_1.XLSX]

## Sheet: Table S1
Supplementary Table S1. Chloroplast markers.
SUBSPECIE	VARIETY	cpDNA MARKERS
		1	2		3			4			5						6			8	9		11				12
		CCMP5R	OeR16Qa-F		matK2-3F			QR-1RF			QR-2F						QR-3R			TrnTD-2F	TrnTL1F		SSR31F				SSR45F
EUROPAEA (Linage E1)	HF558645	T11CA12	--AT	T12	C	G	G	T11CA10		A	A	T	TTAGATAA	T	----------	A12	A	A	A	A13	C	T11	C	T10	T	G	T	T10
	ACO1	T11CA12	--AT	T12	C	G	G	T11CA10		A	A	T	TTAGATAA	T	----------	A12	A	A	A	A13	C	T11	C	T10	T	G	T	T10
	ACO5	T11CA12	--AT	T12	C	G	G	T11CA10		A	A	T	TTAGATAA	T	----------	A12	A	A	A	A13	C	T11	C	T10	T	G	T	T10
	ACO14	T11CA12	--AT	T12	C	G	G	T11CA10		A	A	T	TTAGATAA	T	----------	A12	A	A	A	A13	C	T11	C	T10	T	G	T	T10
	ACO15	T11CA12	--AT	T12	C	G	G	T11CA10		A	A	T	TTAGATAA	T	----------	A12	A	A	A	A13	C	T11	C	T10	T	G	T	T10
	ACO18	T11CA12	--AT	T12	C	G	G	T11CA10		A	A	T	TTAGATAA	T	----------	A12	A	A	A	A13	C	T11	C	T10	T	G	T	T10
	ACZ1	T11CA12	--AT	T12	C	G	G	T11CA10		A	A	T	TTAGATAA	T	----------	A12	A	A	A	A13	C	T11	C	T10	T	G	T	T10
	ACZ2	T11CA12	--AT	T12	C	G	G	T11CA10		A	A	T	TTAGATAA	T	----------	A12	A	A	A	A13	C	T11	C	T10	T	G	T	T10
	ACZ3	T11CA12	--AT	T12	C	G	G	T11CA10		A	A	T	TTAGATAA	T	----------	A12	A	A	A	A13	C	T11	C	T10	T	G	T	T10
	ACZ4	T11CA12	--AT	T12	C	G	G	T11CA10		A	A	T	TTAGATAA	T	----------	A12	A	A	A	A13	C	T11	C	T10	T	G	T	T10
	ACZ5	T11CA12	--AT	T12	C	G	G	T11CA10		A	A	T	TTAGATAA	T	----------	A12	A	A	A	A13	C	T11	C	T10	T	G	T	T10
	ACZ7	T11CA12	--AT	T12	C	G	G	T11CA10		A	A	T	TTAGATAA	T	----------	A12	A	A	A	A13	C	T11	C	T10	T	G	T	T10
	ACZ8	T11CA12	--AT	T12	C	G	G	T11CA10		A	A	T	TTAGATAA	T	----------	A12	A	A	A	A13	C	T11	C	T10	T	G	T	T10
	ACZ9	T11CA12	--AT	T12	C	G	G	T11CA10		A	A	T	TTAGATAA	T	----------	A12	A	A	A	A13	C	T11	C	T10	T	G	T	T10
	ACZ10	T11CA12	--AT	T12	C	G	G	T11CA10		A	A	T	TTAGATAA	T	----------	A12	A	A	A	A13	C	T11	C	T10	T	G	T	T10
	ACZ12	T11CA12	--AT	T12	C	G	G	T11CA10		A	A	T	TTAGATAA	T	----------	A12	A	A	A	A13	C	T11	C	T10	T	G	T	T10
	AMK5	T11CA12	--AT	T12	C	G	G	T11CA10		A	A	T	TTAGATAA	T	----------	A12	A	A	A	A13	C	T11	C	T10	T	G	T	T10
	AMK6	T11CA12	--AT	T12	C	G	G	T11CA10		A	A	T	TTAGATAA	T	----------	A12	A	A	A	A13	C	T11	C	T10	T	G	T	T10
	AMK14	T11CA12	--AT	T12	C	G	G	T11CA10		A	A	T	TTAGATAA	T	----------	A12	A	A	A	A13	C	T11	C	T10	T	G	T	T10
	AMK16	T11CA12	--AT	T12	C	G	G	T11CA10		A	A	T	TTAGATAA	T	----------	A12	A	A	A	A13	C	T11	C	T10	T	G	T	T10
	AMK21	T11CA12	--AT	T12	C	G	G	T11CA10		A	A	T	TTAGATAA	T	----------	A12	A	A	A	A13	C	T11	C	T10	T	G	T	T10
	AMK26	T11CA12	--AT	T12	C	G	G	T11CA10		A	A	T	TTAGATAA	T	----------	A12	A	A	A	A13	C	T11	C	T10	T	G	T	T10
	AMK34	T11CA12	--AT	T12	C	G	G	T11CA10		A	A	T	TTAGATAA	T	----------	A12	A	A	A	A13	C	T11	C	T10	T	G	T	T10
	AMK9	T11CA12	--AT	T12	C	G	G	T11CA10		A	A	T	TTAGATAA	T	----------	A12	A	A	A	A13	C	T11	C	T10	T	G	T	T10
	AMK12	T11CA12	--AT	T12	C	G	G	T11CA10		A	A	T	TTAGATAA	T	----------	A12	A	A	A	A13	C	T11	C	T10	T	G	T	T10
	AMK25	T11CA12	--AT	T12	C	G	G	T11CA10		A	A	T	TTAGATAA	T	----------	A12	A	A	A	A13	C	T11	C	T10	T	G	T	T10
	AMK27	T11CA12	--AT	T12	C	G	G	T11CA10		A	A	T	TTAGATAA	T	----------	A12	A	A	A	A13	C	T11	C	T10	T	G	T	T10
	AMS7	T11CA12	--AT	T12	C	G	G	T11CA10		A	A	T	TTAGATAA	T	----------	A12	A	A	A	A13	C	T11	C	T10	T	G	T	T10
	AMS8	T11CA12	--AT	T12	C	G	G	T11CA10		A	A	T	TTAGATAA	T	----------	A12	A	A	A	A13	C	T11	C	T10	T	G	T	T10
	AMS11	T11CA12	--AT	T12	C	G	G	T11CA10		A	A	T	TTAGATAA	T	----------	A12	A	A	A	A13	C	T11	C	T10	T	G	T	T10
	AMS12	T11CA12	--AT	T12	C	G	G	T11CA10		A	A	T	TTAGATAA	T	----------	A12	A	A	A	A13	C	T11	C	T10	T	G	T	T10
	AMS15	T11CA12	--AT	T12	C	G	G	T11CA10		A	A	T	TTAGATAA	T	----------	A12	A	A	A	A13	C	T11	C	T10	T	G	T	T10
	AMS16	T11CA12	--AT	T12	C	G	G	T11CA10		A	A	T	TTAGATAA	T	----------	A12	A	A	A	A13	C	T11	C	T10	T	G	T	T10
	AMS17	T11CA12	--AT	T12	C	G	G	T11CA10		A	A	T	TTAGATAA	T	----------	A12	A	A	A	A13	C	T11	C	T10	T	G	T	T10
	AMS18	T11CA12	--AT	T12	C	G	G	T11CA10		A	A	T	TTAGATAA	T	----------	A12	A	A	A	A13	C	T11	C	T10	T	G	T	T10
	AMS19	T11CA12	--AT	T12	C	G	G	T11CA10		A	A	T	TTAGATAA	T	----------	A12	A	A	A	A13	C	T11	C	T10	T	G	T	T10
	FRA1	T11CA12	--AT	T12	C	G	G	T11CA10		A	A	T	TTAGATAA	T	----------	A12	A	A	A	A13	C	T11	C	T10	T	G	T	T10
	FRA2	T11CA12	--AT	T12	C	G	G	T11CA10		A	A	T	TTAGATAA	T	----------	A12	A	A	A	A13	C	T11	C	T10	T	G	T	T10
	FRA3	T11CA12	--AT	T12	C	G	G	T11CA10		A	A	T	TTAGATAA	T	----------	A12	A	A	A	A13	C	T11	C	T10	T	G	T	T10
	FRA4	T11CA12	--AT	T12	C	G	G	T11CA10		A	A	T	TTAGATAA	T	----------	A12	A	A	A	A13	C	T11	C	T10	T	G	T	T10
	APR1	T11CA12	--AT	T12	C	G	G	T11CA10		A	A	T	TTAGATAA	T	----------	A12	A	A	A	A13	C	T11	C	T10	T	G	T	T10
EUROPAEA (Linage E2)	FN997650	T10CA12	--AC	T12	C	G	G	T10CA10		A	A	C	--------	A	A5TA3G	A14	A	A	A	A13	C	T11	A	T9	T	G	T	T10
	ARC1	T10CA12	--AC	T12	C	G	G	T10CA10		A	A	C	--------	A	A5TA3G	A14	A	A	A	A13	C	T11	A	T9	T	G	T	T10
	AOU1	T10CA12	--AC	T12	C	G	G	T10CA10		A	A	C	--------	A	A5TA3G	A14	A	A	A	A13	C	T11	A	T9	T	G	T	T10
	AOU2	T10CA12	--AC	T12	C	G	G	T10CA10		A	A	C	--------	A	A5TA3G	A14	A	A	A	A13	C	T11	A	T9	T	G	T	T10
	AOU3	T10CA12	--AC	T12	C	G	G	T10CA10		A	A	C	--------	A	A5TA3G	A14	A	A	A	A13	C	T11	A	T9	T	G	T	T10
	AOU4	T10CA12	--AC	T12	C	G	G	T10CA10		A	A	C	--------	A	A5TA3G	A14	A	A	A	A13	C	T11	A	T9	T	G	T	T10
	AOU5	T10CA12	--AC	T12	C	G	G	T10CA10		A	A	C	--------	A	A5TA3G	A14	A	A	A	A13	C	T11	A	T9	T	G	T	T10
	AOU7	T10CA12	--AC	T12	C	G	G	T10CA10		A	A	C	--------	A	A5TA3G	A14	A	A	A	A13	C	T11	A	T9	T	G	T	T10
	AOU8	T10CA12	--AC	T12	C	G	G	T10CA10		A	A	C	--------	A	A5TA3G	A14	A	A	A	A13	C	T11	A	T9	T	G	T	T10
	AOU9	T10CA12	--AC	T12	C	G	G	T10CA10		A	A	C	--------	A	A5TA3G	A14	A	A	A	A13	C	T11	A	T9	T	G	T	T10
	AOU10	T10CA12	--AC	T12	C	G	G	T10CA10		A	A	C	--------	A	A5TA3G	A14	A	A	A	A13	C	T11	A	T9	T	G	T	T10
	AOU11	T10CA12	--AC	T12	C	G	G	T10CA10		A	A	C	--------	A	A5TA3G	A14	A	A	A	A13	C	T11	A	T9	T	G	T	T10
	AOU12	T10CA12	--AC	T12	C	G	G	T10CA10		A	A	C	--------	A	A5TA3G	A14	A	A	A	A13	C	T11	A	T9	T	G	T	T10
	AOU13	T10CA12	--AC	T12	C	G	G	T10CA10		A	A	C	--------	A	A5TA3G	A14	A	A	A	A13	C	T11	A	T9	T	G	T	T10
	TAM3	T10CA12	--AC	T12	C	G	G	T10CA10		A	A	C	--------	A	A5TA3G	A14	A	A	A	A13	C	T11	A	T9	T	G	T	T10
	TAM4	T10CA12	--AC	T12	C	G	G	T10CA10		A	A	C	--------	A	A5TA3G	A14	A	A	A	A13	C	T11	A	T9	T	G	T	T10
	TAM9	T10CA12	--AC	T12	C	G	G	T10CA10		A	A	C	--------	A	A5TA3G	A14	A	A	A	A13	C	T11	A	T9	T	G	T	T10
	TAM12	T10CA12	--AC	T12	C	G	G	T10CA10		A	A	C	--------	A	A5TA3G	A14	A	A	A	A13	C	T11	A	T9	T	G	T	T10
	TAM13	T10CA12	--AC	T12	C	G	G	T10CA10		A	A	C	--------	A	A5TA3G	A14	A	A	A	A13	C	T11	A	T9	T	G	T	T10
EUROPAEA (Linage E3)	FN997651	T10CA13	--AT	T12	C	G	G	T11CA10		A	A	C	TTAGATAA	A	A5TA3G	A11	A	A	A	A12	C	T11	A	T10	C	A	T	T10
	AJA1	T10CA13	--AT	T12	C	G	G	T11CA10		A	A	C	TTAGATAA	A	A5TA3G	A11	A	A	A	A12	C	T11	A	T10	C	A	T	T10
	AJA4	T10CA13	--AT	T12	C	G	G	T11CA10		A	A	C	TTAGATAA	A	A5TA3G	A11	A	A	A	A12	C	T11	A	T10	C	A	T	T10
	AJA6	T10CA13	--AT	T12	C	G	G	T11CA10		A	A	C	TTAGATAA	A	A5TA3G	A11	A	A	A	A12	C	T11	A	T10	C	A	T	T10
	AJA12	T10CA13	--AT	T12	C	G	G	T11CA10		A	A	C	TTAGATAA	A	A5TA3G	A11	A	A	A	A12	C	T11	A	T10	C	A	T	T10
	AJA17	T10CA13	--AT	T12	C	G	G	T11CA10		A	A	C	TTAGATAA	A	A5TA3G	A11	A	A	A	A12	C	T11	A	T10	C	A	T	T10
	AJA18	T10CA13	--AT	T12	C	G	G	T11CA10		A	A	C	TTAGATAA	A	A5TA3G	A11	A	A	A	A12	C	T11	A	T10	C	A	T	T10
LAPERRINE	MG255765	T11CA12	--AT	T12	C	G	G	T11CCA9		A	A	C	TTAGATAA	T	----------	A12	A	A	A	A13	C	T11	C	T11	T	G	T	T10
	Dhokar Oct413	T11CA12	--AT	T12	C	G	G	T11CCA9		A	A	C	TTAGATAA	T	----------	A12	A	A	A	A13	C	T11	C	T11	T	G	T	T10
	DHO1	T11CA12	--AT	T12	C	G	G	T11CCA9		A	A	C	TTAGATAA	T	----------	A12	A	A	A	A13	C	T11	C	T11	T	G	T	T10
	DHO2	T11CA12	--AT	T12	C	G	G	T11CCA9		A	A	C	TTAGATAA	T	----------	A12	A	A	A	A13	C	T11	C	T11	T	G	T	T10
	DHO4	T11CA12	--AT	T12	C	G	G	T11CCA9		A	A	C	TTAGATAA	T	----------	A12	A	A	A	A13	C	T11	C	T11	T	G	T	T10
	DHO6A	T11CA12	--AT	T12	C	G	G	T11CCA9		A	A	C	TTAGATAA	T	----------	A12	A	A	A	A13	C	T11	C	T11	T	G	T	T10
	DHO6B	T11CA12	--AT	T12	C	G	G	T11CCA9		A	A	C	TTAGATAA	T	----------	A12	A	A	A	A13	C	T11	C	T11	T	G	T	T10
	DHO6C	T11CA12	--AT	T12	C	G	G	T11CCA9		A	A	C	TTAGATAA	T	----------	A12	A	A	A	A13	C	T11	C	T11	T	G	T	T10
	DHO8A	T11CA12	--AT	T12	C	G	G	T11CCA9		A	A	C	TTAGATAA	T	----------	A12	A	A	A	A13	C	T11	C	T11	T	G	T	T10
	DHO10A	T11CA12	--AT	T12	C	G	G	T11CCA9		A	A	C	TTAGATAA	T	----------	A12	A	A	A	A13	C	T11	C	T11	T	G	T	T10
	DHO10B	T11CA12	--AT	T12	C	G	G	T11CCA9		A	A	C	TTAGATAA	T	----------	A12	A	A	A	A13	C	T11	C	T11	T	G	T	T10
	DHO11A	T11CA12	--AT	T12	C	G	G	T11CCA9		A	A	C	TTAGATAA	T	----------	A12	A	A	A	A13	C	T11	C	T11	T	G	T	T10
	DHO12A	T11CA12	--AT	T12	C	G	G	T11CCA9		A	A	C	TTAGATAA	T	----------	A12	A	A	A	A13	C	T11	C	T11	T	G	T	T10
	DHO13A	T11CA12	--AT	T12	C	G	G	T11CCA9		A	A	C	TTAGATAA	T	----------	A12	A	A	A	A13	C	T11	C	T11	T	G	T	T10
MAROCCANA	FN998900	T10CA15	--AT	T12	C	G	A	T11CCA9		T	T	C	TTAGATAA	A	A5TA3G	A12	A	A	A	A12	C	T10	A	T10	T	G	C	T10
	MAR1	T10CA15	--AT	T12	C	G	A	T11CCA9		T	T	C	TTAGATAA	A	A5TA3G	A12	A	A	A	A12	C	T10	A	T10	T	G	C	T10
	MAR2	T10CA15	--AT	T12	C	G	A	T11CCA9		T	T	C	TTAGATAA	A	A5TA3G	A12	A	A	A	A12	C	T10	A	T10	T	G	C	T10
	MAR3	T10CA15	--AT	T12	C	G	A	T11CCA9		T	T	C	TTAGATAA	A	A5TA3G	A12	A	A	A	A12	C	T10	A	T10	T	G	C	T10
GUANCHICA	MG255764	T11CA13	--AT	T12	C	G	G	T11CCA9		T	T	C	TTAGATAA	A	A5TA3G	A12	A	A	A	A12	C	T10	A	T10	T	G	C	T10
	W49	T11CA13	--AT	T12	C	G	G	T11CCA9		T	T	C	TTAGATAA	A	A5TA3G	A12	A	A	A	A12	C	T10	A	T10	T	G	C	T10
	GUA1	T11CA13	--AT	T12	C	G	G	T11CCA9		T	T	C	TTAGATAA	A	A5TA3G	A12	A	A	A	A12	C	T10	A	T10	T	G	C	T10
	GUA2	T11CA13	--AT	T12	C	G	G	T11CCA9		T	T	C	TTAGATAA	A	A5TA3G	A12	A	A	A	A12	C	T10	A	T10	T	G	C	T10
	GUA3	T11CA13	--AT	T12	C	G	G	T11CCA9		T	T	C	TTAGATAA	A	A5TA3G	A12	A	A	A	A12	C	T10	A	T10	T	G	C	T10
	GUA4	T11CA13	--AT	T12	C	G	G	T11CCA9		T	T	C	TTAGATAA	A	A5TA3G	A12	A	A	A	A12	C	T10	A	T10	T	G	C	T10
	GUA5	T11CA13	--AT	T12	C	G	G	T11CCA9		T	T	C	TTAGATAA	A	A5TA3G	A12	A	A	A	A12	C	T10	A	T10	T	G	C	T10
	GUA6	T11CA13	--AT	T12	C	G	G	T11CCA9		T	T	C	TTAGATAA	A	A5TA3G	A12	A	A	A	A12	C	T10	A	T10	T	G	C	T10
	GUA7	T11CA13	--AT	T12	C	G	G	T11CCA9		T	T	C	TTAGATAA	A	A5TA3G	A12	A	A	A	A12	C	T10	A	T10	T	G	C	T10
	GUA8	T11CA13	--AT	T12	C	G	G	T11CCA9		T	T	C	TTAGATAA	A	A5TA3G	A12	A	A	A	A12	C	T10	A	T10	T	G	C	T10
	GUA9	T11CA13	--AT	T12	C	G	G	T11CCA9		T	T	C	TTAGATAA	A	A5TA3G	A12	A	A	A	A12	C	T10	A	T10	T	G	C	T10
CERASIFORMIS	Cer3 (EDB)	T10CA13	----	T12	C	G	G	T12CCA9		T	T	C	TTAGATAA	A	A5TA3G	A12	A	A	A	A12	C	T10	A	T10	T	G	C	T10
	CER1	T10CA13	----	T12	C	G	G	T12CCA9		T	T	C	TTAGATAA	A	A5TA3G	A12	A	A	A	A12	C	T10	A	T10	T	G	C	T10
	CER3	T10CA13	----	T12	C	G	G	T12CCA9		T	T	C	TTAGATAA	A	A5TA3G	A12	A	A	A	A12	C	T10	A	T10	T	G	C	T10
CUSPIDATA	FN650747	T10CA13	--AT	T12	A	C	G	T11CCA8		A	A	C	TTAGATAA	A	A5TA3G	A11	-	C	C	A10	T	T9	C	T10	T	G	T	T9
	CUS3	T10CA13	--AT	T12	A	C	G	T11CCA8		A	A	C	TTAGATAA	A	A5TA3G	A11	-	C	C	A10	C	T9	C	T10	T	G	T	T9
	CUS4	T10CA13	--AT	T12	A	C	G	T11CCA8		A	A	C	TTAGATAA	A	A5TA3G	A11	-	C	C	A10	C	T9	C	T10	T	G	T	T9
	CUS6	T10CA13	--AT	T12	A	C	G	T11CCA8		A	A	C	TTAGATAA	A	A5TA3G	A11	-	C	C	A10	C	T9	C	T10	T	G	T	T9
	CUS11	T10CA13	--AT	T12	A	C	G	T11CCA8		A	A	C	TTAGATAA	A	A5TA3G	A11	-	C	C	A10	C	T9	C	T10	T	G	T	T9
	CUS12	T10CA13	--AT	T12	A	C	G	T11CCA8		A	A	C	TTAGATAA	A	A5TA3G	A11	-	C	C	A10	T	T9	C	T10	T	G	T	T9
	CUS13	T10CA13	--AT	T12	A	C	G	T11CCA8		A	A	C	TTAGATAA	A	A5TA3G	A11	-	C	C	A10	T	T9	C	T10	T	G	T	T9
	CUS14	T10CA13	--AT	T12	A	C	G	T11CCA8		A	A	C	TTAGATAA	A	A5TA3G	A11	-	C	C	A10	T	T9	C	T10	T	G	T	T9
	CUS15	T10CA13	--AT	T12	A	C	G	T11CCA8		A	A	C	TTAGATAA	A	A5TA3G	A11	-	C	C	A10	T	T9	C	T10	T	G	T	T9
	CEH2	T10CA13	--AT	T12	A	C	G	T11CCA8		A	A	C	TTAGATAA	A	A5TA3G	A11	-	C	C	A10	C	T9	C	T10	T	G	T	T9
	CEH3	T10CA13	--AT	T12	A	C	G	T11CCA8		A	A	C	TTAGATAA	A	A5TA3G	A11	-	C	C	A10	C	T9	C	T10	T	G	T	T9
	CEH6	T10CA13	--AT	T12	A	C	G	T11CCA8		A	A	C	TTAGATAA	A	A5TA3G	A11	-	C	C	A10	C	T9	C	T10	T	G	T	T9
	CEH7	T10CA13	--AT	T12	A	C	G	T11CCA8		A	A	C	TTAGATAA	A	A5TA3G	A11	-	C	C	A10	C	T9	C	T10	T	G	T	T9
	CEH8	T10CA13	--AT	T12	A	C	G	T11CCA8		A	A	C	TTAGATAA	A	A5TA3G	A11	-	C	C	A10	C	T9	C	T10	T	G	T	T9
	CEH9	T10CA13	--AT	T12	A	C	G	T11CCA8		A	A	C	TTAGATAA	A	A5TA3G	A11	-	C	C	A10	C	T9	C	T10	T	G	T	T9
	CEH17	T10CA13	--AT	T12	A	C	G	T11CCA8		A	A	C	TTAGATAA	A	A5TA3G	A11	-	C	C	A10	C	T9	C	T10	T	G	T	T9
	CEH19	T10CA13	--AT	T12	A	C	G	T11CCA8		A	A	C	TTAGATAA	A	A5TA3G	A11	-	C	C	A10	C	T9	C	T10	T	G	T	T9
	CEH20	T10CA13	--AT	T12	A	C	G	T11CCA8		A	A	C	TTAGATAA	A	A5TA3G	A11	-	C	C	A10	C	T9	C	T10	T	G	T	T9
	CEH21	T10CA13	--AT	T12	A	C	G	T11CCA8		A	A	C	TTAGATAA	A	A5TA3G	A11	-	C	C	A10	C	T9	C	T10	T	G	T	T9
	CEH23	T10CA13	--AT	T12	A	C	G	T11CCA8		A	A	C	TTAGATAA	A	A5TA3G	A11	-	C	C	A10	C	T9	C	T10	T	G	T	T9
	CEH24	T10CA13	--AT	T12	A	C	G	T11CCA8		A	A	C	TTAGATAA	A	A5TA3G	A11	-	C	C	A10	C	T9	C	T10	T	G	T	T9
	CEH25	T10CA13	--AT	T12	A	C	G	T11CCA8		A	A	C	TTAGATAA	A	A5TA3G	A11	-	C	C	A10	C	T9	C	T10	T	G	T	T9
	CEH26	T10CA13	--AT	T12	A	C	G	T11CCA8		A	A	C	TTAGATAA	A	A5TA3G	A11	-	C	C	A10	C	T9	C	T10	T	G	T	T9
	CEH30	T10CA13	--AT	T12	A	C	G	T11CCA8		A	A	C	TTAGATAA	A	A5TA3G	A11	-	C	C	A10	C	T9	C	T10	T	G	T	T9
WOODIANA	FN998901	T12CA11	ATAT	T14	C	C	G	T10CCA10		T	T	C	TTAGATAA	A	A5TA4	ATA3GA11	-	A	C	A12	C	T8	C	T3AT6C	T	G	T	T11
SUBSPECIE	VARIETY	1	2		3			4			5						6			8	9		11				12
		CCMP5R	OeR16Qa-F		matK2-3F			QR-1RF			QR-2F						QR-3R			TrnTD-2F	TrnTL1F		SSR31F				SSR45F
		cpDNA MARKERS

## Sheet: Table S2
Supplementary Table S2. Primer sequences and PCR products used as polimorphic cpDNA markers
Polymorphism	Primer sequences (5’–>3’)		Length	TM	Size (pb)	Reference
Ccmp5	F	CAAAATGAACTCCTGCCTCC	20	58.4	262-266	This Work
	R	ATTCGAGGGGGAAATGAGAG	20	58.4
OeR16Qa	F	TTGGAACCGGTATGGAATTG	20	56.4	329-335	García-Verdugo et al., 2010
	R	TTTGAAATCAGTGAAGGGTCAA	22	56.4
MatK2-3	F	CCTTGTTTTGACTGTATCGCAC	22	60.1	494	This Work
	R	GGATGGGGTGGGGTATTAG	19	59.5
QR-1	F	GGGTCTCCCACAATATCGAA	20	58.4	445-447	This Work
	R	GTGGACTAAAGCGTCGGATTG	21	61.2
QR-2	F	CCTGGACGTGAAGAATAAAATCC	23	60.9	383-398	This Work
	R	CAGGCCATCAGAATAAGAAGG	21	59.5
QR-3	F	GGGTCTTTCGGTCTTATTCATATTC	25	62.5	466-467	This Work
	R	CACCTATGTCAGCTTTTTGTCTG	23	60.9
TrnTD-2	F	TTTACAGTCCGTCCCCATTAAC	22	60.1	409-430	This Work
	R	CCCTGAACAAATCCTATCCCTC	22	62.1
TrnTL1	F	AACATTCCTCCGCTTTCATTC	21	57.5	231-234	This Work
	R	CTGGAACCCTTGAATTCATTAG	22	58.4
SSR-31	F	GTTGACCCCTTGGCTTTTC	19	57.5	445-447	Besnard et al., 2013
	R	AGTGCCTTCCCCCTTTTC	18	56.3
SSR-45	F	GTACGGGCATTATCTTTTGTGC	22	60.1	293-295	Besnard et al., 2011

## Sheet: Table S3
Supplementary Table S3. SSR markers used in this study
Name	Primer sequences (5′ to 3′)		LABEL	TM	Repeat motif	PCR Product size	Reference
DCA3	F	CCCAAGCGGAGGTGTATATTGTTAC	5'FAM	65.8	(GA)19	227-253	Sefc et al., 2000
	R	TGCTTTTGTCGTGTTTGAGATGTTG		62.5
DCA5	F	AACAAATCCCATACGAACTGCC	5'FAM	60.3	(GA)15	196-240	Sefc et al., 2000
	R	CGTGTTGCTGTGAAGAAAATCG		60.3
DCA16	F	TTAGGTGGGATTCTGTAGATGGTTG	5'FAM	64.2	(GT)13(GA)29	122-210	Sefc et al., 2000
	R	TTTTAGGTGAGTTCATAGAATTAGC		59.2
DCA9	F	AATCAAAGTCTTCCTTCTCATTTCG	5'HEX	60.9	(GA)23	164-204	Sefc et al., 2000
	R	GATCCTTCCAAAAGTATAACCTCTC		62.5
DCA18	F	AAGAAAGAAAAAGGCAGAATTAAGC	5'HEX	59.2	(CA)4CT(CA)3(GA)19	158-182	Sefc et al., 2000

## Sheet: Table S4
Supplementary Table S4. Amplicons size of cpDNA markers
	cpDNA Markers
	1	2	3	4	5	6	8	9	11	12
Subspecies	CCMP5	OeR16Qa-F	matK2-3F	QR-1RF	QR-2F	QR-3R	TrnTD-2F	TrnTL1F	SSR31F	SSR45F
Europaea-E1	263	331	494	446	383	467	412	234	446	294
Europaea-E2	263	331	494	445	387	467	412	234	445	294
Europaea-E3	264	331	494	446	392	467	411	234	446	294
Laperrine	263	331	494	446	383	467	412	234	447	294
Guanchica	264	331	494	446	393	467	411	233	446	294
Cerasiformis	264	329	494	447	393	467	411	233	446	294
Maroccana	266	331	494	446	393	467	411	233	446	294
Cuspidata	264	331	494	445	392	466	409	232	446	293
Cuspidata x Europaea	264	331	494	445	392	466	409	232	446	293
Olea Woodiana	262	335	494	446	398	466	430	231	447	295
Size range	262-266	329-335	494	445-447	383-398	466-467	409-430	231-234	445-447	293-295
Amplicons were truncated avoiding blunt ends to optimize MEGA alignment.

## Sheet: Table S5
Supplementary Table S5. Fragment analysis of SSR markers.
Subspecies	Genotypes	Ploidy	SSR Markers
			ssrOeUA-DCA3	ssrOeUA-DCA5	ssrOeUA-DCA16	ssrOeUA-DCA9	ssrOeUA-DCA18
Guanchica	W49	2X	230/251	207/203	173/173	161/194	168/178
	GUA1	2X	230/251	207/203	145/173	161/183	168/166
	GUA2	2X	241/251	203/203	121/173	183/194	166/178
	GUA3	2X	230/241	207/199	145/173	194/194	176/178
	GUA4	2X	230/230	203/203	145/173	161/161	168/176
	GUA5	2X	241/251	207/203	145/173	161/183	166/178
	GUA6	2X	237/251	196/203	149/173	185/194	174/178
	GUA7	2X	230/251	199/203	121/173	161/194	168/176
	GUA8	2X	230/237	207/203	145/173	161/183	166/178
	GUA9	2X	241/251	207/199	121/173	161/183	168/166
Cuspidata	CUS3	2X	237/230	197/197	141/141	171/165	166/178
	CUS4	2X	230/249	197/197	141/138	173/165	162/178
	CUS6	2X	230/249	197/199	141/147	173/171	162/178
	CUS11	2X	230/230	197/197	138/154	173/173	166/178
	CUS12	2X	237/230	199/203	141/121	173/181	174/186
	CUS13	2X	237/247	199/203	138/173	173/183	178/178
	CUS14	2X	230/247	197/203	141/124	173/183	174/174
	CUS15	2X	230/230	197/196	145/130	173/183	166/178
	CEH2	2X	230/237	197/203	124/154	183/165	168/184
	CEH5	2X	230/237	197/203	124/154	191/165	174/184
	CEH6	2X	230/237	197/203	170/154	183/165	174/184
	CEH7	2X	230/251	197/203	154/154	161/165	170/184
	CEH8	2X	230/247	197/203	170/154	191/165	158/168
	CEH9	2X	230/251	197/203	173/170	191/165	158/170
	CEH17	2X	230/251	197/203	121/170	161/165	174/184
	CEH19	2X	230/247	197/203	154/154	191/165	174/184
	CEH20	2X	230/237	197/203	173/170	191/165	170/184
	CEH21	2X	230/237	197/203	154/154	191/165	158/174
	CEH23	2X	230/247	197/203	124/170	183/165	158/174
	CEH24	2X	230/237	197/203	124/170	191/165	158/174
	CEH25	2X	230/237	197/203	124/170	183/165	158/168
	CEH26	2X	230/247	197/203	170/154	191/165	158/168
	CEH30	2X	230/251	197/203	121/154	161/165	174/184
Cerasiformis	CER0	4X	237/249	199/192	-	181/191/175	170/176/184/166
	CER1	3X	251/237	199/196/205	134/121	175/181	178/194/182
	CER3	3X	251/265	199/196/202	134/121	175/187	176/194/182
Europaea	AMK5	2X	230/247	199/203	136/173	193/165	178/178
	AMK6	2X	230/247	203/203	136/145	193/165	168/178
	AMK14	2X	251/247	203/203	136/154	180/196	170/168
	AMK16	2X	251/247	209/203	136/136	196/196	170/170
	AMK21	2X	251/247	199/203	124/173	193/193	168/178
	AMK26	2X	237/247	203/203	136/154	193/161	170/184
	AMK34	2X	237/237	209/203	136/136	193/165	170/178
	ACO1	2X	237/253	192/207	160/173	183/161	174/174
	ACO5	2X	237/251	192/203	173/173	183/161	170/184
	ACO14	2X	237/241	199/196	136/173	183/175	178/174
	ACO15	2X	237/243	192/203	143/165	171/161	170/184
	ACO18	2X	237/241	199/196	143/173	183/161	172/174
	W69	2X	251/253	196/203	145/173	204/204	172/178
	AJA1	2X	253/241	199/203	121/173	183/204	172/166
	AJA4	2X	253/230	199/203	121/173	183/204	172/176
	AJA6	2X	251/241	199/196	145/145	161/204	172/168
	AJA12	2X	251/241	199/203	121/173	183/204	176/178
	AJA17	2X	251/237	203/203	145/145	204/204	184/178
	AJA10	2X	251/230	199/203	145/121	183/204	166/178
	AJA18	2X	251/241	203/203	145/173	183/204	166/178
	W45	2X	237/237	199/196	154/154	183/177	184/174
	ACZ1	2X	237/230	199/203	154/145	183/177	166/174
	ACZ2	2X	237/241	199/203	154/145	183/177	166/174
	ACZ3	2X	237/247	199/198	154/154	183/183	170/184
	ACZ4	2X	237/230	196/203	154/121	177/177	166/184
	ACZ5	2X	237/241	196/203	154/145	183/177	166/184
	ACZ7	2X	237/237	196/196	154/154	183/204	172/174
	ACZ8	2X	237/247	196/203	154/124	171/177	184/174
	ACZ9	2X	237/241	199/196	154/154	183/183	184/174
	ACZ10	2X	237/247	196/196	154/145	183/189	166/174
	ACZ12	2X	237/247	199/211	154/154	171/177	164/184
	ARC1	2X	237/243	199/211	145/145	161/175	166/174
	APR1	2X	234/239	199/203	173/157	183/191	166/166
	Frantoio (NR 80)	2X	235/241	196/203	149/149	183/183	174/174
	FRA1	2X	237/241	199/196	121/149	183/175	172/174
	FRA2	2X	237/241	203/203	154/149	183/191	174/174
	FRA3	2X	235/237	203/203	124/149	183/161	174/174
	FRA4	2X	247/241	203/203	121/149	183/183	168/174
	AMS7	2X	237/237	203/203	149/154	183/204	178/166
	AMS11	2X	237/237	203/203	173/154	183/193	178/166
	AMS12	2X	237/251	203/203	149/154	204/204	166/182
	AMS16	2X	237/237	203/203	149/154	193/204	178/178
	AOU1	2X	237/239	213/207	200/183	181/181	196/172
	AOU2	2X	230/239	213/198	154/183	181/191	196/180
	AOU3	2X	237/230	196/203	173/143	165/204	164/178
	AOU5	2X	237/237	213/198	157/183	181/179	196/182
	AOU10	3X	237/237	213/203	154/173	183/204	178/182/196
	AOU13	2X	239/251	213/203	154/154	181/193	170/170
	TAM3	2X	237/237	199/198	183/183	193/193	182/186
	TAM4	2X	237/237	196/202	154/183	193/191	176/166
	TAM9	2X	237/237	198/198	159/170	193/175	176/184
	TAM12	2X	237/237	196/202	164/170	193/165	174/180
	TAM13	2X	237/230	199/202	164/170	193/165	186/180
	TAM11	2X	237/237	198/198	161/170	193/204	166/172
	Arbequina	2X	230/241	199/203	121/145	183/204	176/166
Laperrine	Dhokar (Oct413)	2X	237/237	213/203	149/149	171/193	178/170
	DHO1	2X	237/237	213/203	154/149	193/204	178/170
	DHO2	2X	237/251	213/203	154/149	193/204	178/170
	DHO4	2X	237/251	213/203	154/149	171/204	178/178
	DHO6A	2X	237/251	213/203	173/149	171/193	178/170
	DHO6B	2X	237/251	203/203	173/149	171/204	170/170
	DHO8A	2X	237/251	203/203	154/149	171/161	178/166
	DHO10A	3X	237/237	203/203	173/149/121	193/161	178/166
	DHO11A	3X	237/237	213/203/199	154/149	171/193/183	178/166/170
	DHO12A	2X	237/237	213/203	173/149	193/191	178/166
Maroccana	MAR0	6X	241/237	196/203/199/201	149/146	177/175/185	176/174/172/180/178
	MAR1	6X	247/237/243/230	213/203/199	154/149/183/121/132	171/185	172/176/184
	MAR2	6X	247/241/243	202/203/199	156/145	171/185	172/184/182
	MAR3	6X	247/237/243	202/203/199	154/126	171/204	170/176/186

## Sheet: Table S6
Supplementary Table S6. Morphological features of wild genotypes from the SILVOLIVE collection.
	Variety	Ploidy	Height	Basal diameter	Shoot biomass	Leaves biomass	Total biomass	Total number nodes	Root biomass	Number Secondary stems	Branching efficiency	Branching frequency	Root / Shoot Ratio
Very Low Vigour	AMK26	2X	--	--	+/-	--	--	+	--	++	++	++	+
	FRA1	2X	--	--	--	-	--	--	-	--	--	--	+
	AOU1	2X	--	--	--	--	--	--	--	--	--	--	--
	GUA3	2X	--	--	--	--	--	--	--	--	--	-	-
	MAR1	6X	--	--	--	--	--	--	--	--	--	--	--
	DHO6A	2X	--	-	--	--	-	--	+	-	-	++	++
	DHO4	2X	--	--				--		--	--	--
	MAR3	6X	--	--	-	--	-	--	+/-	--	--	--	+/-
	AMK21	2X	--	--	--	--	--	-	-	-	+/-	+/-	++
	DHO12A	2X	--	--	--	--	--	--	--	--	--	--	++
	AMK9	2X	--	--	--	--	--	--	-	--	-	+/-	++
	CUS14	2X	--	-	+	+	+	-	+/-	+	+	++	--
	DHO8A	2X	--	-	-	-	+/-	-	+	+/-	+/-	+	+/-
	AMS17	2X	--	+/-	-	--	-	--	+/-	--	--	--	+
	AMS15	2X	--	+	--	--	--	--	-	--	--	-	+/-
	AMK27	2X	--	--	--	--	--	--	--	+/-	+	++	-
	AMK6	2X	--	--	--	--	--	-	--	-	+	+/-	+
	GUA8	2X	--	--	--	-	--	-	-	+/-	+	+/-	++
	AMK5	2X	--	--	--	--	--	+/-	-	+	++	++	+
	AMK12	2X	--	+/-	--	--	-	-	+	+/-	+/-	+	++
	CEH8	2X	--	+/-	--	-	-	+	+/-	+	+	+	+/-
Low Vigour	AJA12	2X	-	--	--	--	--	-	--	-	-	-	+
	DHO1	2X	-	+/-	-	-	-	-	+/-	--	--	--	-
	AMK25	2X	-	-	--	--	--	-	-	-	-	-	+/-
	AMK16	2X	-	-	--	--	--	+/-	-	-	-	--	--
	CEH2	2X	-	+/-	+/-	+/-	-	+/-	-	+/-	+/-	+/-	++
	DHO13A	2X	-	+/-				-		--	--	--
	FRA4	2X	-	-	-	-	--	--	--	-	-	-	++
	DHO10B	2X	-	-	+/-	+/-	+	--	++	--	--	--	++
	AOU13	2X	-	-	++	+	++	--	++	-	+/-	++	+/-
	AJA1	2X	-	-	+/-	+	+/-	+/-	+/-	+/-	+	-	-
	AMS12	2X	-	--	+	+	+	--	++	+/-	+	++	+/-
	AOU3	2X	-	-	+	+/-	+	--	++	--	--	-	+/-
	AMS7	2X	-	+/-	+/-	-	+/-	--	++	--	--	--	++
	GUA1	2X	-	--	--	-	-	+/-	-	+/-	+	-	-
	GUA9	2X	-	--	--	--	--	-	--	+/-	+	++	-
	GUA2	2X	-	-	-	+/-	-	-	+	-	+/-	-	+
	CEH25	2X	-	+/-	-	-	--	+	--	+	+	+	+/-
	AMK14	2X	-	+/-	+/-	-	+/-	+	+	-	-	-	-
	DHO10A	3X	-	++	+	++	++	+/-	++	+/-	-	+/-	+
	TAM3	2X	-	+	-	--	-	-	+/-	--	--	-	+
	ACZ10	2X	-	+	+/-	+	+/-	++	+/-	++	++	+	--
Intermediate Vigour	AJA17	2X	+/-	--	+/-	+/-	-	+	--	+	++	+	--
	FRA3	2X	+/-	+	-	+/-	-	--	--	--	--	--	+/-
	DHO6B	2X	+/-	-	-	-	+/-	--	++	--	--	--	++
	AJA18	2X	+/-	+/-	-	-	-	+	-	++	++	++	+
	ACO15	2X	+/-	-	-	-	-	+	-	++	++	+	+/-
	CEH17	2X	+/-	+	-	+	+	-	++	--	--	--	++
	CER3	3X	+/-	-	+/-	+/-	+/-	+/-	+/-	+	+	++	+/-
	ACO14	2X	+/-	--	--	--	--	+/-	--	+	+	++	+/-
	TAM4	2X	+/-	+	+	+	+	++	+	+	+	+/-	-
	AJA4	2X	+/-	+/-	-	+	+/-	+/-	+/-	--	--	--	--
	GUA5	2X	+/-	-	-	+/-	+/-	+/-	+/-	+/-	+	+	+
	CER1	3X	+/-	+/-	+/-	+/-	-	++	--	++	++	++	--
	AOU9	2X	+/-	+/-	+	+/-	+	-	+	+/-	+/-	+	-
	GUA4	2X	+/-	-	-	+/-	+/-	+	+	++	++	++	+
	ACZ4	2X	+/-	-	+/-	+/-	+/-	+	+/-	++	++	+	-
	ACZ3	2X	+/-	+/-	+/-	-	-	+/-	--	+/-	+/-	+/-	+/-
	AMS11	2X	+/-	+/-	+	+/-	++	-	++	-	-	+	+/-
	CUS3	2X	+/-	--	-	+	+/-	+	+/-	+	++	++	--
	CEH26	2X	+/-	+	+/-	-	-	+/-	--	-	-	-	-
	TAM12	2X	+/-	+	-	-	+/-	++	+	+	+	-	+
	TAM13	2X	+/-	+				+/-		-	-	-
High Vigour	ACZ1	2X	+	+	-	+	+/-	+	+/-	+	+	+/-	-
	AOU8	2X	+	+/-	++	+/-	+	--	+	-	-	+/-	--
	CEH3	2X	+	+/-	+/-	++	+	++	+/-	++	++	+	-
	AJA6	2X	+	-	+/-	+/-	+	++	+	-	-	--	--
	ACO18	2X	+	++	+	+/-	+	+	+	++	+	++	+
	ACZ2	2X	+	+	+/-	-	-	-	--	+/-	-	+/-	+
	TAM9	2X	+	+/-	+/-	-	+/-	-	++	-	-	-	+
	AOU12	2X	+	+	++	+	++	+/-	+	+/-	+/-	+/-	--
	ACZ5	2X	+	+	-	+/-	+/-	+	+/-	+/-	+/-	+/-	-
	CEH20	2X	+	+/-	+	+	+/-	+/-	-	+/-	+/-	+/-	+
	AMK34	2X	+	-	+	+/-	+/-	+	-	-	+/-	--	--
	CEH30	2X	+	+	+/-	+	-	-	-	--	--	-	+/-
	AOU5	2X	+	+/-				++		++	++	++
	AOU10	3X	+	++	++	++	++	-	++	-	--	-	--
	FRA2	2X	+	++	++	+/-	+	-	-	-	-	-	-
	ACZ8	2X	+	+/-	+	++	++	++	+/-	++	++	+/-	--
	CEH9	2X	+	+	++	++	++	++	++	-	-	--	-
	CEH24	2X	+	-	+	++	+	++	+	++	++	+	-
	ACZ7	2X	+	++	+	+	+	++	+/-	++	++	++	--
	ACZ12	2X	+	+	+	+	+/-	+	--	+	+/-	+/-	+/-
	CUS15	2X	+	+	+/-	-	--	+/-	--	+/-	-	-	--
	CEH6	2X	+	+	+	+	+	+	+	+	+	+	+/-
Very High Vigour	GUA7	2X	++	-	+	+	+	++	+	++	++	+	+
	CUS4	2X	++	++	++	++	++	++	+	+	+/-	--	-
	APR	2X	++	++	++	++	++	++	++	++	+	+	-
	CEH21	2X	++	+	+	++	++	+	+	++	++	+	--
	CEH7	2X	++	++	+	++	++	+/-	++	+/-	-	-	+/-
	CUS12	2X	++	++	+/-	-	-	+	--	+	+/-	+/-	+
	ACZ9	2X	++	+	+	++	++	+	++	+	+	+	++
	CEH23	2X	++	++	+	+	+	+/-	+/-	-	-	-	+
	GUA6	2X	++	+	++	++	++	++	++	+	+	--	--
	DHO6C	2X	++	+	++	+	+	+	-	+	+/-	+/-	--
	CEH19	2X	++	++	++	++	++	+	+	+	+/-	+	+
	AOU7	2X	++	++				+/-		+/-	+/-	+/-
	ARC	2X	++	++	++	++	++	++	++	+	+/-	+	-
	AOU2	2X	++	++	++	++	+	++	-	++	+	++	-
	CUS13	2X	++	++	++	+/-	+/-	+/-	-	+/-	-	+/-	+/-
	ACO5	2X	++	++	++	+	+	+	-	+	+/-	+	+
	AOU4	2X	++	++	++	++	++	+/-	+/-	+	+/-	+	--
	CUS6	2X	++	++	++	++	++	++	+	++	++	+/-	+/-
MEAN			94.5397	7.03867	8.70269	7.62868	25.1064	125.605	9.29551	12.9436	1.87009	0.231077	0.414284
MIN			30.5	3.49341	1.64721	1.26283	3.4224	24.219	0.595273	0	0	0	0.184168
MAX			183.767	11.4006	32.9152	28.9916	78.3392	353.208	26.1703	45.1475	6.89955	0.536016	0.782107
CV			0.316169	0.214058	0.66725	0.610816	0.514981	0.587511	0.548676	0.700797	0.70025	0.417042	0.305077
Early vigour parameters measured in 103 genotypes of the SILVOLIVE collection 13 months after ex-vitro acclimatization. The genotypes are sorted from lower to higher vigour according to the plant height and classified in five categories: very low (- -); low (-); medium (+/-); high (+); and very high (++) vigour.

## Sheet: Table S7
	Supplementary Table S7. Correlations between morphological parameters
											BRANCHING PARAMETERS						ROOT / SHOOT RATIO
				VIGOUR PARAMETERS
				Height	Basal diameter	Shoot biomass	Leaves biomass	Total biomass	Internode lenght	Root biomass	Total number nodes	Total leaves	Secondary stems	Branching efficiency	Tertiary stems	Branching frequency	Root / Shoot Ratio
		VIGOUR PARAMETERS	Height	1	0.758116	0.747162	0.726904	0.725182	0.4145	0.303494	0.598457	0.576089	0.434263	0.206132	0.169335	0.10039	-0.29498
			Basal diameter	0.758116	1	0.788279	0.716247	0.725295	0.2443	0.336574	0.470809	0.444345	0.280339	-0.0375842	0.188391	0.00021161	-0.172239
			Shoot biomass	0.747162	0.788279	1	0.815179	0.896505	0.504	0.445971	0.502454	0.479456	0.306328	0.0600313	0.286149	0.109802	-0.321301
			Leaves biomass	0.726904	0.716247	0.815179	1	0.863957	0.4851	0.459083	0.610768	0.584764	0.43425	0.202709	0.236322	0.112021	-0.312883
			Total biomass	0.725182	0.725295	0.896505	0.863957	1	0.494	0.727716	0.5693	0.58433	0.346867	0.132723	0.265201	0.0844847	-0.244276
			Internode lenght	0.4145	0.2443	0.504	0.4851	0.494	1	0.0993	0.0217	0.0175	0.0363	0.0018	0.0032	0.018	0.0684
			Root biomass	0.303494	0.336574	0.445971	0.459083	0.727716	0.0993	1	0.180958	0.240176	0.046083	-0.0459778	0.0484623	0.00595212	0.112343
	BRANCHING PARAMETERS		Total number nodes	0.598457	0.470809	0.502454	0.610768	0.5693	0.0217	0.180958	1	0.956511	0.831211	0.688623	0.499329	0.272377	-0.354613
			Total leaves	0.576089	0.444345	0.479456	0.584764	0.58433	0.0175	0.240176	0.956511	1	0.732723	0.600428	0.391361	0.162795	-0.368927
			Secondary stems	0.434264	0.280339	0.306328	0.43425	0.346867	0.0363	0.046083	0.831211	0.732723	1	0.925229	0.42738	0.624356	-0.229289
			Branching efficiency	0.206132	-0.0375842	0.0600313	0.202709	0.132723	0.0018	-0.0459778	0.688623	0.600428	0.925229	1	0.440131	0.711824	-0.189074
			Terciary stems	0.169335	0.188391	0.286149	0.236322	0.265201	0.0032	0.0484623	0.499329	0.391361	0.42738	0.440131	1	0.463152	-0.106504
			Branching frequency	0.10039	0.00021161	0.109802	0.112021	0.0844847	0.018	0.00595212	0.272377	0.162795	0.624356	0.711824	0.463152	1	-0.000928744
	ROOT / SHOOT RATIO		Root/Shoot Ratio	-0.29498	-0.172239	-0.321301	-0.312883	-0.244276	0.0684	0.112343	-0.354613	-0.368928	-0.229289	-0.189074	-0.106504	-0.000928744	1

## Sheet: Table S8
Supplementary Table S8. Distribution of root-to-shoot ratio and branching patterns according to plant vigour
	Number of Genotypes analyzed	High R/S Ratio (%)	Low R/S Ratio (%)	High Branching (%)	Low Branching (%)
Very low- and low-vigour Genotypes	42	45%	28%	21%	36%
Intermediate vigour Genotypes	21	28%	38%	47%	19%
High- and very high-vigour Genotypes	42	28%	52%	24%	9%
Values calculated from the data present in the Supplementary Table S4. High Root/Shoot ratio genotypes include those with ++ or + values. Low Root/Shoot ratio genotypes include those with -- or - values. High branching genotypes include those with ++ or + values. Low branching genotypes include those with -- or - values.

## Sheet: Table S9
Supplementary Table S9. Grafting compatibility
			Grafting efficiency (%)
			var. Picual	var. Hojiblanca
Subsp.europaea E1		AMK5-6-14-16-21-; ACO5-15-18; ACZ3-5-8-9; APR; FRA2-3-4	65.8784	83.3333
Subsp.europaea E2		ARC	61.5385	0
Subsp.europaea E3		AJA6-12-17-18	55.814	100
Subsp. laperrinei		DHO10B	55.5556	-
Subsp. cerasiformis		CER3	20	-
Subsp.maroccana		-	-	-
Subsp. guanchica		GUA1-2-3-7-8-9	61.6438	40
Subsp. cuspidata		CUS4-6-11-13-15;CEH6-7-8-17-19-20-21-24-26	78.5714	96.9697
Picual self-grafting			67.7	-
Hojiblanca selft-grafting			-	83.5
TOTAL			57	80.3922
